# Supplementary material for: Antibiofilm Activity and Biocompatibility of Temporin-SHa: A Promising Antimicrobial Peptide for Control of Fluconazole-Resistant Candida albicans
Source: MDPI journal article supplement (doi:10.3390/microorganisms12010099), 2024-01-04
Supplement: s1 [file s1]

## SUPPLEMENTARY FILE:

The significant viability reduction ( $\geq 50\%$ ) was observed after longitudinal exposure of CaS planktonic culture to Fluconazole (Figure S1-a) compared to the control ( $p \leq 0.05$ ) after 6 and 24h, at concentrations of 256  $\mu\text{g/mL}$  (6h: 57%; 24h: 58%), 512  $\mu\text{g/mL}$  (6h: 54%; 24h: 59%), and 1024  $\mu\text{g/mL}$  (6h: 62%; 24h: 68%). Regarding the results of CaR after the longitudinal exposure to Fluconazole (Figure S1-b), significant reduction ( $\geq 50\%$ ) were observed compared to the control group ( $p \leq 0.05$ ) after 6 and 24h at concentrations of 256  $\mu\text{g/mL}$  (6h: 54%; 24h: 58%), 512  $\mu\text{g/mL}$  (6h: 56%; 24h: 59%) and 1024  $\mu\text{g/mL}$  (6h: 62%; 24h: 65%).

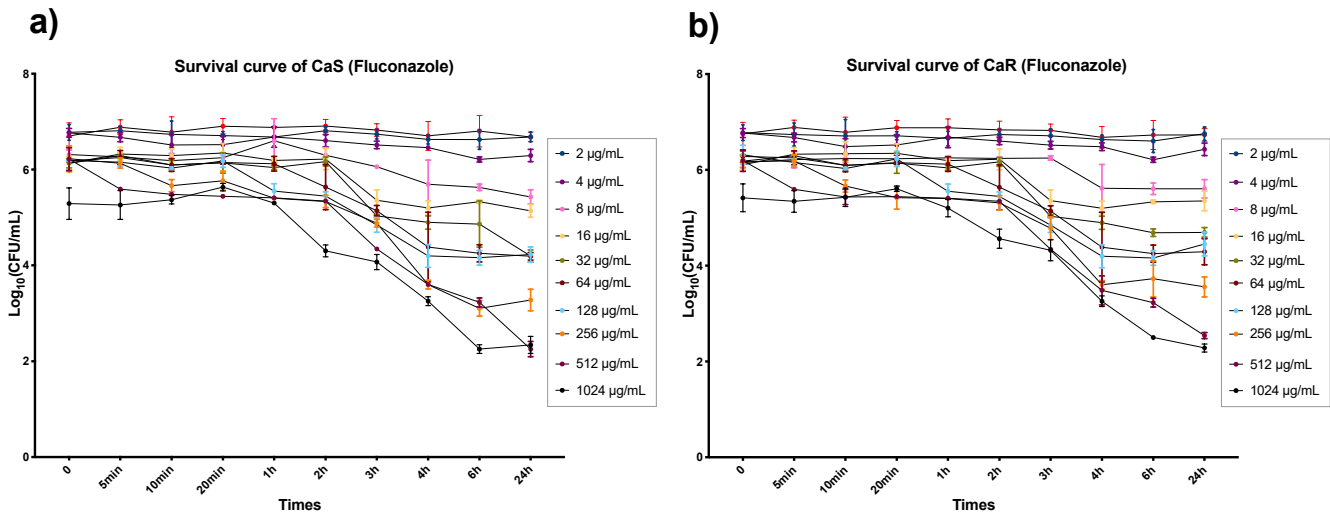

**Figure S1.** Mean and 95% confidence interval of survival in  $\text{log}_{10}$  of CaS (a) and CaR (b) suspensions after longitudinal exposure to predetermined concentrations (2, 4, 8, 16, 32, 64, 128, 512 and 1024  $\mu\text{g/mL}$ ) of Fluconazole at predetermined times (0; 5 min; 10 min; 20 min; 30 min; 1 hour; 2 hours; 3h; 4h; 6h and 24h). Points: data averages. Error bars: minimum and maximum values. The non-intersection of the error bars denotes a statistical difference according to the 95% confidence interval ( $n=12/\text{group}$ ;  $p < 0.05$ ).

For treatment with a standardized drug, Fluconazole, the concentration capable of a reduction of  $\geq 50\%$  MFC of CaS (Figure S2-a) and CaR (Figure S2-b) viable colonies was  $\geq 256 \mu\text{g/mL}$ . The highest CaS and CaR viable colony reductions were found at 1024  $\mu\text{g/mL}$  in 66% and 60% (approximately 5  $\text{log}_{10}$ ) reduction for CaS and CaR, respectively, with this being statistically different from the control group ( $p \leq 0.05$ ).

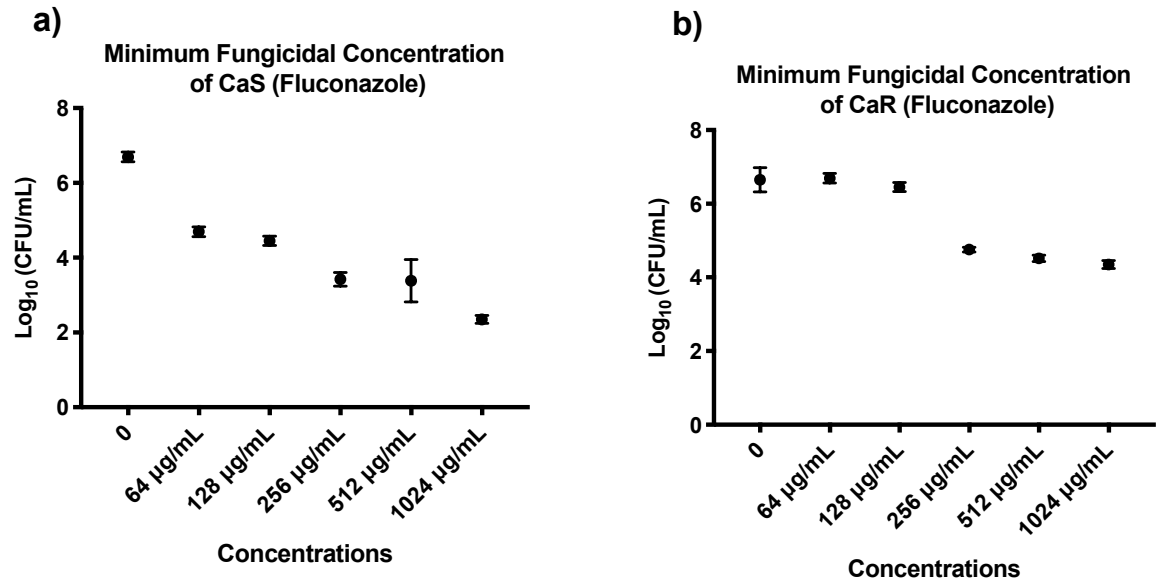

**Figure S2.** Mean and 95% confidence interval of the MFC ( $\log_{10}$ ) of CaS (a) and CaR (b) suspensions after exposure to Fluconazole at 64, 128, 256, 512 and 1024  $\mu\text{g/mL}$ . Points: data means. Error bars: minimum and maximum values. The non-intersection of the error bars denotes a difference according to the 95% confidence interval ( $n=12/\text{group}$ ;  $p<0.05$ ).
